# Supplementary material for: Association of Aspirin Therapy with Prognosis in Patients with Nonobstructive Coronary Artery Disease: A Systematic Review and Meta-Analysis
Source: Research Square preprint supplement (doi:10.21203/rs.3.rs-1440518/v1), 2022-03-16
Supplement: Supplementary file 1 [file a9feaac25e16c88c50d786b8.docx]

**Supplementary Table S1 Detailed search strategies.**

| Databases  Search strategies | |
| --- | --- |
| Pubmed (1520) | |
| #1 | "non?obstruct*"[tiab] OR "non obstruct*"[tiab] OR "no obstruct*"[tiab] OR "without obstruct*"[tiab] OR "absent obstruct*"[tiab] OR "non?significant"[tiab] OR "insignificant"[tiab] OR "non significant"[tiab] OR "no significant"[tiab] OR "near normal"[tiab] OR "mild"[tiab] |
| #2 | "atherosclerotic stenosis"[tiab] OR "coronary stenosis"[Mesh] OR "stenotic lesion*"[tiab] OR "coronary artery"[tiab] OR "coronary arteries"[tiab] |
| #3 | "aspirin"[tw] OR "anti?platelet"[tiab] OR "acetylsalicylic acid"[tw] OR "anti?thrombocytic"[tiab] OR "prevention"[tiab] OR "medication"[tiab] |
| #4 | #1 AND #2 AND #3 |
| Embase (1614) | |
| #1 | 'non?obstruct*':ab,ti OR 'non obstruct*':ab,ti OR 'no obstruct*':ab,ti OR 'without obstruct*':ab,ti OR 'absent obstruct*':ab,ti OR 'absence of obstruct*':ab,ti OR 'non?significant':ab,ti OR 'insignificant':ab,ti OR 'non significant':ab,ti OR 'no significant':ab,ti OR 'near normal':ab,ti OR 'mild':ab,ti |
| #2 | 'atherosclerotic stenosis':ab,ti OR 'coronary stenosis'/exp OR 'stenotic lesion*':ab,ti OR 'coronary artery'/exp OR 'coronary arteries':ab,ti |
| #3 | 'aspirin' OR 'anti?platelet':ab,ti OR 'acetylsalicylic acid' OR 'anti?thrombocytic':ab,ti OR 'prevention':ab,ti OR ' medication':ab,ti |
| #4 | #1 AND #2 AND #3 |
| Web of Science (1477) | |
| #1 | TS="nonobstruct*" OR TS="non obstruct*" OR TS="no obstruct*" OR TS="without obstruct*" OR TS="absent obstruct*" OR TS="absence of obstruct*" OR TS="non?significant" OR TS="insignificant" OR TS="non significant" OR TS="no significant" OR TS="near normal" OR TS="mild" |
| #2 | TS="atherosclerotic stenosis" OR TS="coronary stenosis" OR TS="stenotic lesion*" OR TS="coronary artery" OR TS="coronary arteries" |
| #3 | ALL="aspirin" OR TS="anti?platelet" OR ALL="acetylsalicylic acid" OR TS="anti?thrombocytic" OR TS="prevention" OR TS="medication" |
| #4 | #1 AND #2 AND #3 |
| Cochrane (83) |  |
|  | ("non?obstruct*" OR "non obstruct*" OR "no obstruct*" OR "without obstruct*") AND ("atherosclerotic stenosis" OR "coronary stenosis" OR "stenotic lesion*" OR "coronary artery" OR "coronary arteries") AND ("aspirin" OR "anti?platelet" OR "acetylsalicylic acid" OR "anti?thrombocytic" OR "prevention" OR "medication") |
